# Supplementary material for: Highly selective hydrogenation of 5-hydroxymethylfurfural to 2,5-dimethylfuran at low temperature over a Co–N–C/NiAl-MMO catalyst
Source: Royal Society of Chemistry journal article supplement (doi:10.1039/d0cy00363h), 2020-01-01
Supplement: d0cy00363h1.pdf [file d0cy00363h1.pdf]

# Supporting information

## Highly Selective Hydrogenation of 5-Hydroxymethylfurfural to 2,5-Dimethylfuran over a Co-N-C/NiAl-MMO catalyst

Ning Ma<sup>a</sup>, Yong Song<sup>a</sup>, Feng Han<sup>a</sup>, Geoffrey I.N. Waterhouse<sup>b</sup>, Yan Li<sup>\*a</sup>, Shiyun Ai<sup>\*a</sup>

---

<sup>a</sup>. College of Chemistry and Material Science, Shandong Agricultural University, Taian, Shandong, 271018, China

<sup>b</sup>. School of Chemical Sciences, The University of Auckland Private Bag 92019, Auckland, New Zealand

---

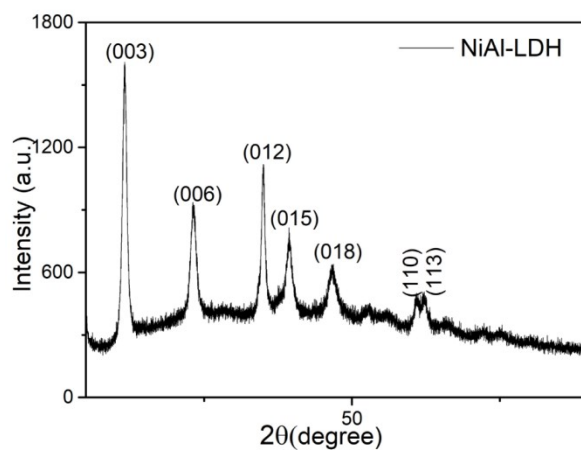

Figure S1. XRD pattern for NiAl-LDH

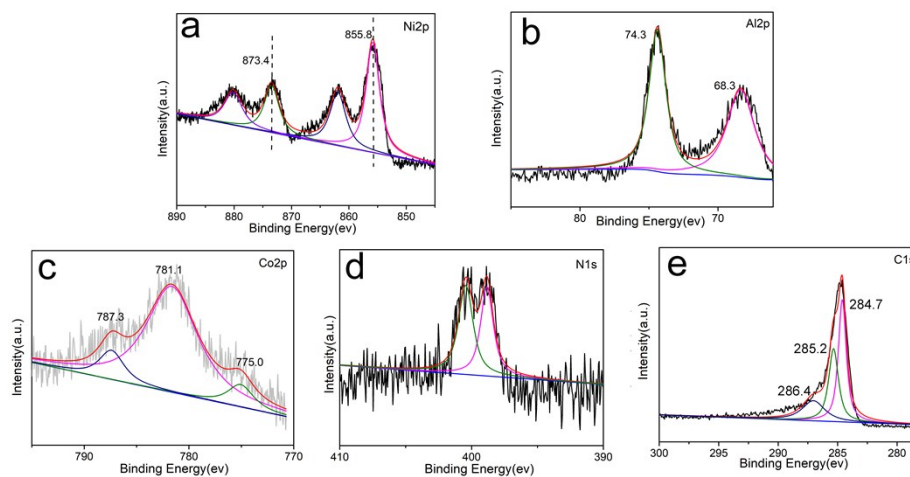

Figure S2. XPS data for Co-N-C/NiAl-MMO-3

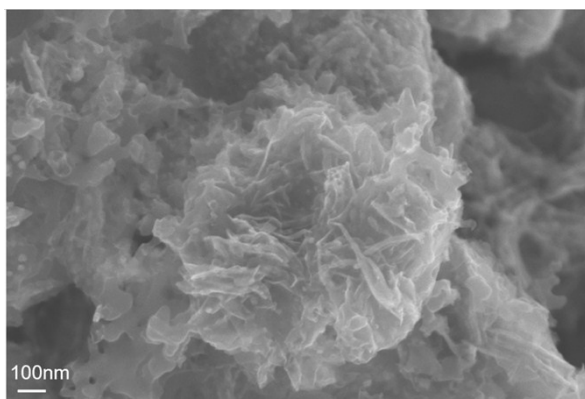

Figure S3. SEM image of the Co-N-C/NiAl-MMO-3 catalyst.

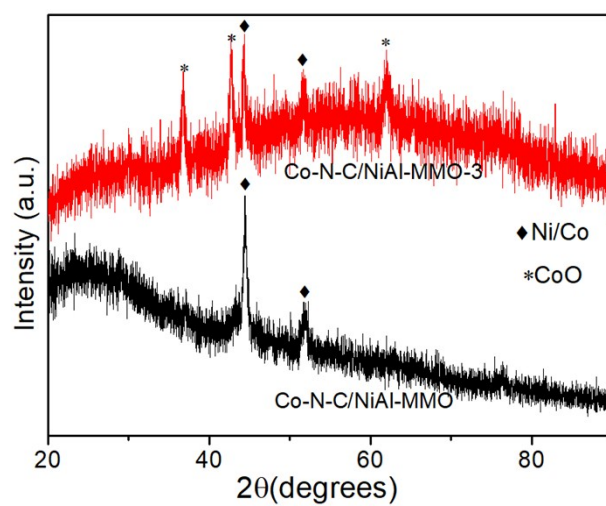

**Figure S4.** XRD patterns for the Co-N-C/NiAl-MMO-3 and Co-N-C/NiAl-MMO catalysts. The crystalline phases present in the samples are indicated.

---
